# Supplementary material
Source: publisher figshare collection journal article supplement (https://gsajournals.figshare.com/ndownloader/files/23994311)
Supplement: Supplementary file 1 [file 23994311]

taxa	PC1	PC2	PC3	PC4	PC5	PC6
1__a550817.4325015.052018.683_A10.CEL	68.6176602418761	-98.4877596835255	18.0086769911839	-39.4859007042673	42.5478938105451	14.9115833621365
2__a550817.4325015.052018.683_A12.CEL	89.2331758804226	-77.53725723337	17.0199811983889	-3.27745299475362	40.7511496625543	11.6901093752578
3__a550817.4325015.052018.683_B01.CEL	79.9885880138824	-85.6201508360956	33.7319465744852	-20.4051768255941	64.8772262261919	3.07558248096293
4__a550817.4325015.052018.683_B02.CEL	77.7688851607741	-107.814706244149	28.1348425083096	7.98305512204273	33.0077555513974	7.1564944103763
5__a550817.4325015.052018.683_B06.CEL	71.1068046125919	-91.8517697794365	34.5761473816058	-22.1090669839231	32.5566597108893	-10.7914720607921
6__a550817.4325015.052018.683_B09.CEL	66.5428542306231	-93.7555396057381	44.0950183307667	-18.1950079709516	46.15176802838	4.81954126262018
7__a550817.4325015.052018.683_C01.CEL	79.3243842218108	-95.6854860139819	33.7051841824483	-24.0951093420754	26.6688390057063	-19.1562683090477
8__a550817.4325015.052018.683_C08.CEL	86.5940205639953	-84.613018750583	7.99710600902858	-7.17702949346287	43.4860221951487	7.92194033051112
9__a550817.4325015.052018.683_C09.CEL	74.6842198731774	-97.3431072303999	31.6033904145366	-19.9553809666396	32.7443016679367	-33.0739840440505
10__a550817.4325015.052018.683_D04.CEL	67.3992080698713	-78.5287330991819	18.2097874991696	-2.38554010893339	20.9826043102474	16.282367424016
11__a550817.4325015.052018.683_D07.CEL	62.4778320060993	-101.072015329188	29.3482364665479	-1.64809872349975	38.2567569830524	0.539434795994863
12__a550817.4325015.052018.683_D08.CEL	78.7070482831506	-101.590167758882	20.86062750821	-33.9813240477984	36.9920405367764	18.0996973284829
13__a550817.4325015.052018.683_D10.CEL	73.6844463965651	-90.5391611730866	37.6594479469962	-11.5797586485394	26.0697512012989	7.32843359213031
14__a550817.4325015.052018.683_E05.CEL	87.304854639044	-90.4104245023492	34.1950766102348	-2.39815822814803	42.6557530793966	42.9775709458953
15__a550817.4325015.052018.683_E06.CEL	-170.513417753842	-12.2620753806878	84.4519207900014	46.3947969458302	64.302344721998	-47.237567715649
16__a550817.4325015.052018.683_E08.CEL	62.5015771319125	-99.6335775138542	14.1762248845174	-8.16253091847451	19.1090435830575	-4.70218686350063
17__a550817.4325015.052018.683_E09.CEL	68.8037870719905	-51.3500861995572	20.5841315705925	-9.47213482654461	18.4530773072799	31.8976748626193
18__a550817.4325015.052018.683_E10.CEL	-194.333068318143	11.5501938014849	81.1381237705599	55.8975156110504	-19.6145559433204	-58.5375707944334
19__a550817.4325015.052018.683_E11.CEL	-147.841309353705	-19.4652256557795	94.3432304057857	36.19236976539	53.8198503513295	2.32016723232946
20__a550817.4325015.052018.683_F02.CEL	-161.400787357104	-4.0027214895915	77.7316957622065	71.0529771416576	17.280488756713	-31.1075342751633
21__a550817.4325015.052018.683_F03.CEL	-168.353468562255	-14.2717625443996	91.0923355866656	81.4184817161383	19.4041362536643	-33.1650484388433
22__a550817.4325015.052018.683_F05.CEL	-161.952713220455	-34.5477843885312	85.3575911815396	49.2109109191514	37.1012975116179	-38.2058120600981
23__a550817.4325015.052018.683_F06.CEL	-146.903325184689	-21.0225740519879	82.7579437194903	71.3521570189265	24.8325264951313	-16.9449009985316
24__a550817.4325015.052018.683_F07.CEL	76.2900327039646	-96.0168362725297	37.87302847892	-12.0965473183328	37.8445373988401	50.9484714392954
25__a550817.4325015.052018.683_F08.CEL	68.9275417257739	-86.9622023178027	18.1408384681912	-17.4286903302985	32.2095030338481	22.8977706396673
26__a550817.4325015.052018.683_F09.CEL	65.5442277572367	-29.1973051764575	8.6262950805975	-29.7514052616801	10.003622103416	31.5307611710887
27__a550817.4325015.052018.683_G01.CEL	-153.576367634427	-16.1541047584301	106.843130564782	69.2262570778503	12.4237405647238	-12.4362803368698
28__a550817.4325015.052018.683_G02.CEL	52.3456979128309	-45.6869585888401	21.8271953408634	17.9275406018687	-17.0166873055295	15.5535100057857
29__a550817.4325015.052018.683_G03.CEL	-168.880360257517	-19.4729494898998	82.6238532080543	59.4443223956093	21.8955464506981	-15.6281944156472
30__a550817.4325015.052018.683_G07.CEL	42.325638436855	-39.2094634023425	28.0684499750491	-16.562206947603	-22.7170344799771	-23.1617349827825
31__a550817.4325015.052018.683_G08.CEL	-117.258477439846	37.0334672934343	67.3444119642239	10.9719970518561	27.4998371186014	54.2112359224022
32__a550817.4325015.052018.683_G09.CEL	-127.795564859473	-3.75495672022333	80.891637943794	30.8056284749383	44.7667476743343	65.1697032379994
33__a550817.4325015.052018.683_G12.CEL	-123.730378166131	10.1497820620146	71.2378056445712	47.1919178638243	42.2833546758554	93.7368419604687
34__a550817.4325015.052018.683_H01.CEL	66.9426005043472	-32.1946935970485	-2.37619718785055	-0.726298305670405	3.60595519517746	-34.8906698385908
35__a550817.4325015.052018.683_H02.CEL	-77.3034935046544	-35.2595593750851	-116.376651360199	23.8739692436274	45.8855820341906	-43.5174638253285
36__a550817.4325015.052018.683_H04.CEL	66.6346150067792	-39.4146256955102	14.8606066085086	-20.5010676450817	6.20306092934037	-45.369262408233
37__a550817.4325015.052018.683_H05.CEL	7.4833318933871	79.0106968353392	48.8390216240469	-90.806936782163	-51.0097932123489	25.6782484117136
38__a550817.4325015.052018.683_H07.CEL	-110.070579430928	-11.5876373130059	78.4882971975659	44.2841566762652	40.9065550429781	74.9655782526847
39__a550817.4325015.052018.683_H10.CEL	-120.09112991229	1.61432595455028	71.7281894189571	44.5089917296118	17.9172760752635	67.5481528790539
40__a550817.4325015.052018.683_H11.CEL	-115.671888275382	24.512459682929	72.6757705839362	29.3687016408321	37.876874085054	47.4070951784509
41__a550817.4325015.052018.684_A02.CEL	66.3622426811914	142.387399410668	-10.8108345985671	29.5773007361891	19.9987987044747	-18.1089862859501
42__a550817.4325015.052018.684_A03.CEL	81.0802532583492	142.5297502941	-21.0092537398094	34.7892939932295	15.0276223109172	-38.2038682088442
43__a550817.4325015.052018.684_A04.CEL	96.4210389093737	130.424480369116	-4.38905382845316	20.446188149816	-5.98625396353987	-44.9068702844504
44__a550817.4325015.052018.684_A05.CEL	76.4146516060461	129.058585316819	-1.09025565355728	25.7343021472109	0.765677426164573	-40.3444863431913
45__a550817.4325015.052018.684_A06.CEL	79.4637046238373	133.976535788063	-14.0990906532987	24.3523433886875	-0.0656335907622958	-12.2135584550321
46__a550817.4325015.052018.684_A07.CEL	88.7437625062315	142.063303573012	-16.0618154118227	32.9167054769279	7.95688032917233	-43.994255514363
47__a550817.4325015.052018.684_A08.CEL	67.3510857248517	146.669822417724	-19.3260952365114	22.4368216319467	14.5658455186856	-17.8163423114302
48__a550817.4325015.052018.684_A09.CEL	85.0141066873868	-91.8425195885938	43.9718255770135	-20.689485377297	40.8606872119023	12.5618504222261
49__a550817.4325015.052018.684_A10.CEL	85.3302809326275	141.403704052103	-1.94587168386789	20.2923500925066	-19.2186969123777	-40.9881913413884
50__a550817.4325015.052018.684_A11.CEL	68.4353131435144	144.769842864513	-29.689207271893	9.93376965307408	12.2848006737608	-14.26659105355
51__a550817.4325015.052018.684_A12.CEL	84.4992298838181	144.647241371258	-15.6432682479047	41.6686280412128	-2.17584063443493	-25.4964940992844
52__a550817.4325015.052018.684_B01.CEL	89.1066988576697	124.770311002251	-1.21248483332607	28.0291400997536	8.33359056805067	-20.4591590624343
53__a550817.4325015.052018.684_B02.CEL	70.483826732874	159.876936666335	4.97106312457272	25.0443569872289	15.7886419088152	-30.8990728494968
54__a550817.4325015.052018.684_B03.CEL	56.4348663622721	-52.7130834791935	9.05289870714944	6.19659578268237	-2.69454174143637	14.8237838345178
55__a550817.4325015.052018.684_B05.CEL	77.327194279697	-65.2667047891083	-9.87221724551161	-18.9382572411081	23.2584057488429	29.1863226355359
56__a550817.4325015.052018.684_B11.CEL	83.5797194889904	-92.1994516211592	25.8292239257812	11.6702255829905	21.5102993681627	30.3679884430597
57__a550817.4325015.052018.684_D04.CEL	77.3088188534445	-92.988486041463	34.5567516949244	-34.906974715612	40.1053225211361	-35.9226501967677
58__a550817.4325015.052018.686_C09.CEL	-13.964490364245	9.80630626140946	-43.4472691610152	112.019831107171	-111.979634271272	15.7405912624148
59__a550817.4325015.052018.686_D04.CEL	-29.703135772255	-11.5070375595457	-9.95970343615379	109.105253508819	-123.875709075601	19.2950379706429
60__a550817.4325015.052018.686_E01.CEL	-20.5599572060556	-0.77140407719955	-30.6082239580727	102.008600115151	-97.9050396645834	35.6068210170756
61__a550817.4325015.052018.686_E02.CEL	-41.9950200775774	3.0068591501833	-51.0273788965368	101.532354173781	-105.127838723784	39.674247828814
62__a550817.4325015.052018.686_E10.CEL	-37.3140099034329	-4.17872415526042	-67.8544765819329	110.786239986756	-91.7685032803513	40.3635466113085
63__a550817.4325015.052018.686_E11.CEL	-39.4895103691384	-9.24243924124057	-36.7373297268851	134.95255927092	-124.91089785746	15.3373114475358
64__a550817.4325015.052018.686_F08.CEL	-48.8308143555045	15.9109189415893	-40.1676669987658	104.29100479574	-112.569288277333	19.9053163991684
65__a550817.4325015.052018.686_F09.CEL	-43.6903333158192	0.0922553237958216	-35.194893937959	106.989526598575	-85.8069019341607	10.7200271679304
66__a550817.4325015.052018.686_G04.CEL	-21.5809807718197	-22.6721366583834	-25.675932352709	110.415793024005	-122.147475829367	47.991711186606
67__a550817.4325015.052018.686_G05.CEL	-52.8561927813645	-4.76563564074028	-54.2155505429683	134.24914647103	-123.126520488511	29.2374318038133
68__a550817.4325015.052018.686_H01.CEL	-47.5212535676105	0.843877998765457	-63.3738471797328	114.213455934635	-98.7896769963648	35.533556050754
69__a550817.4325015.052018.686_H11.CEL	-44.0222885092122	3.8788500518337	-55.445960722798	112.289305091344	-122.024620161812	34.015669685358
70__a550817.4325015.052018.687_A02.CEL	59.3217330762771	-36.9531854357332	9.37811486214586	-16.5287630126923	10.0184298439352	-9.86014011428775
71__a550817.4325015.052018.687_A03.CEL	79.025222483687	-24.4739251820517	51.2422784770455	0.524440867263681	10.3877007702746	26.6713027998492
72__a550817.4325015.052018.687_A04.CEL	-59.2178314897986	-24.3320892670263	-109.571978173427	-31.0941372263112	87.6656298243529	11.3520037659685
73__a550817.4325015.052018.687_A05.CEL	57.881344639023	-8.14232137309248	26.4130547532555	16.9374175829882	-20.995916286342	-14.9937125425431
74__a550817.4325015.052018.687_A07.CEL	-52.6598989306708	10.3317407560127	-103.135522621242	-6.55095097451575	85.7223144086397	30.7314292758337
75__a550817.4325015.052018.687_A10.CEL	75.1286701451718	-34.9715359304043	-5.04909000472953	-0.0168785579092808	37.3702419436488	-10.7156949659929
76__a550817.4325015.052018.687_A11.CEL	-23.7330345756332	123.365524871622	80.1742953633304	-54.760991631668	37.0496334988821	44.5080844052192
77__a550817.4325015.052018.687_A12.CEL	51.6161835857526	-3.55040675920506	3.88979607411622	-2.88649045301819	13.5953572237384	-11.4998198815978
78__a550817.4325015.052018.687_B02.CEL	18.2394511535085	-44.9491396603839	-90.0969434871599	-25.5769538861486	-10.2430372093577	-60.2858867642512
79__a550817.4325015.052018.687_B03.CEL	-28.6304076050583	122.265929962247	74.8125424012029	-42.1776231747444	32.6446690373355	37.6715536414469
80__a550817.4325015.052018.687_B04.CEL	-34.3918513748669	109.534306114566	82.9952718088372	-56.9745797057374	19.7052487606949	23.9319430847834
81__a550817.4325015.052018.687_B10.CEL	0.366597949361368	-26.7223473338598	-96.1397017121106	-11.2566871034846	22.8273414478373	-53.0945287953411
82__a550817.4325015.052018.687_B11.CEL	-42.7469930004192	123.382356035133	93.9507034979883	-70.847516304266	25.5200812333231	31.6662324677045
83__a550817.4325015.052018.687_C02.CEL	91.5848863788605	-12.6961334259804	15.4028133815326	53.6139110468834	-82.6309251041745	-17.9254062085055
84__a550817.4325015.052018.687_C03.CEL	40.0498021689793	-69.2080319669555	-24.69853759905	17.9747661829745	2.6794219106679	-49.0159325847755
85__a550817.4325015.052018.687_C05.CEL	84.3309367918526	-19.0542570836538	-23.9080693187378	58.1454902582266	-78.7723794012075	-22.0970670570369
86__a550817.4325015.052018.687_C07.CEL	18.5144098207589	-37.7094744938745	-84.4931423849356	-49.6322149171963	19.8027349439042	-65.1290970897847
87__a550817.4325015.052018.687_C08.CEL	-122.057822165961	6.48268119520895	-104.37110433192	-91.5791213502704	-40.0275581347077	28.0917379837979
88__a550817.4325015.052018.687_C09.CEL	76.0074099393699	-32.776824399317	2.68563782110518	57.0623346990616	-87.0485341672979	-9.91014991044351
89__a550817.4325015.052018.687_C11.CEL	-95.7750226950889	1.82856106010714	-92.6470426042275	-107.413404716255	-27.6936677345031	35.8330015319311
90__a550817.4325015.052018.687_C12.CEL	100.728304905675	-10.2737114166327	-1.31202536622745	33.8919374250695	-60.7995771692692	-20.1693094166748
91__a550817.4325015.052018.687_D02.CEL	77.1056842705672	-36.7928014242183	-8.15426568033143	58.586175864337	-64.6041266463611	3.35958378479083
92__a550817.4325015.052018.687_D03.CEL	-114.212338964486	-13.8684166086466	-97.8339875815415	-104.854038643727	-29.9361441881213	4.33983390631849
93__a550817.4325015.052018.687_D04.CEL	-75.4795091784457	4.97489905208738	-108.40084093092	-72.797728563944	-36.0355178607094	9.92292745685661
94__a550817.4325015.052018.687_D06.CEL	8.79600177859744	-46.5331928352277	-93.8586629967884	-15.2238670533112	-2.94194555148368	-49.5839355229831
95__a550817.4325015.052018.687_D07.CEL	-117.684701022536	0.612670594916008	-99.5334884728489	-82.5528761044966	-31.9298679270782	29.0694077413039
96__a550817.4325015.052018.687_D08.CEL	25.8358614522766	-113.405367943148	5.73915401874319	19.894213114504	15.3516564675152	-35.900975447862
97__a550817.4325015.052018.687_E03.CEL	18.2275756873436	-42.9616549697438	37.3502447119154	-54.8900795085666	-26.2098481839278	-9.56936783365697
100__a550817.4325015.052018.687_E10.CEL	80.7178661798	58.2470689699684	28.7851454461311	-44.6030491475644	46.9195946718206	7.44803656507278
101__a550817.4325015.052018.687_F02.CEL	-137.394870704333	-15.9698168952473	36.5337371954231	23.6547480527412	12.6979923930374	1.01430644441302
102__a550817.4325015.052018.687_F06.CEL	61.5714900130865	-28.4307103691348	-5.63168421793146	6.81438841393284	-2.31406745372286	-14.5783787292188
103__a550817.4325015.052018.687_F09.CEL	17.4304647123222	91.34133227829	47.0164191971221	-79.8090117562418	8.04630469318791	13.8901369687442
104__a550817.4325015.052018.687_F10.CEL	-118.664797717111	-32.2341675048178	43.4458663088461	50.1457292513271	29.6808631998855	24.418323196689
105__a550817.4325015.052018.687_F11.CEL	24.1201308294779	74.5825887287731	31.1150768172915	-84.0666783963291	-8.89572385357114	31.7435611951582
106__a550817.4325015.052018.687_F12.CEL	12.9503602774357	100.908799518304	61.1510873036236	-65.1293164947494	-28.8827989815882	11.2084870665239
107__a550817.4325015.052018.687_G06.CEL	-65.9779497616466	-11.0497299160066	-160.541118616354	-0.148919864120529	47.5278784965439	-0.448856144636921
108__a550817.4325015.052018.687_G07.CEL	5.90250550502112	-93.0223253593402	39.5145741304439	6.41183847764221	-7.31259492349499	-71.6966363752402
109__a550817.4325015.052018.687_G08.CEL	80.3986028782071	-76.5222111389115	11.6582489749529	0.660508488144947	14.3137259385549	41.3373187721686
110__a550817.4325015.052018.687_G10.CEL	19.8263143955399	-25.8816747604613	25.8341218432538	-96.851136767538	-84.6043280955663	-38.4415456080009
111__a550817.4325015.052018.687_G11.CEL	2.65948784348116	-37.6850260741203	29.4292026441999	-93.9006912232014	-72.7203649460321	-36.6172067078948
112__a550817.4325015.052018.688_A02.CEL	-145.059572192619	-13.6091750060246	90.0711193667094	58.3461555144279	60.30340551235	-6.08696868956853
113__a550817.4325015.052018.688_A04.CEL	-164.099893086478	-36.4345824856755	62.8568711497278	53.0895093667645	51.5136061524048	-34.845086059101
114__a550817.4325015.052018.688_A06.CEL	87.1445872861045	-90.4239381630747	33.8518429647218	-8.56024617933116	21.0019941558019	-15.6580871956657
115__a550817.4325015.052018.688_A07.CEL	-178.197968662257	-1.5001679829296	85.7229691096284	21.6313192900686	34.9026780101921	-44.3746364942931
116__a550817.4325015.052018.688_A09.CEL	43.6966032351272	-38.1819245863042	25.6775688395166	3.32523613204991	14.8399233784246	14.8767325623442
117__a550817.4325015.052018.688_A12.CEL	-120.568635879183	-12.1953950896677	70.8649863518607	41.3209247882312	48.4711198611478	77.0715603315623
118__a550817.4325015.052018.688_B01.CEL	46.198024989747	92.2493052221354	-38.5336828819933	-3.86440430815858	36.1485471245912	-0.347061155389445
119__a550817.4325015.052018.688_B05.CEL	-86.3519481042065	-45.5423109739304	-123.177735865752	25.9892978977386	35.9482456190845	-50.2402709230272
120__a550817.4325015.052018.688_B10.CEL	-70.8594594052253	-46.161558572261	-98.8398246033936	15.1071485298034	36.3201032697095	-78.034010873079
121__a550817.4325015.052018.688_C05.CEL	23.7738206972275	-49.9657747052851	31.7474716981167	-56.8742139077946	-42.4971667085727	-4.08562234296427
122__a550817.4325015.052018.688_C06.CEL	1.36710700089669	-59.1237129414142	37.9989769172345	-80.8189145959475	-49.6241062749867	-6.51035423760895
123__a550817.4325015.052018.688_C07.CEL	18.3341102692072	-35.3592364005745	35.6450764033698	-74.1767222960763	-60.8538704259768	-18.8166800079386
124__a550817.4325015.052018.688_C10.CEL	-84.0959635358142	-4.41516233849092	-141.095460894623	44.4796965030632	-15.9921712403389	-12.5954836228581
125__a550817.4325015.052018.688_D02.CEL	-42.9444943552921	-15.086886821895	-132.578219853356	32.7194544190308	13.5011156890792	27.5985657903463
126__a550817.4325015.052018.688_D07.CEL	-81.9571856416949	-6.36734574375895	-122.004257901794	19.8656186078803	16.1448189319777	10.0245228467012
127__a550817.4325015.052018.688_D10.CEL	-70.0093732913987	-18.4013103517827	-113.26344189702	11.637574323839	16.2507530408795	-6.21925390956782
128__a550817.4325015.052018.688_E04.CEL	-74.1806985951287	-29.9838201437591	-123.91778214753	20.3584456089609	3.2252865233744	27.1135431507479
129__a550817.4325015.052018.688_E10.CEL	-71.3167826105892	-12.0767683972207	-133.945379829124	44.0494155416708	-6.35111275470607	17.5116409451238
130__a550817.4325015.052018.688_E11.CEL	81.1066422347037	132.463745394741	-1.50564902941882	19.1660819707799	22.4532665569361	-47.8440040999881
131__a550817.4325015.052018.688_F01.CEL	40.6087758879344	-64.5321033640938	5.95127885221677	33.2504689515827	26.1883859031433	-0.776445367067996
132__a550817.4325015.052018.688_F02.CEL	53.0835236078264	-62.3460550541617	-2.18215614319088	39.0828370051835	-0.783863960393512	3.09118148887634
133__a550817.4325015.052018.688_F03.CEL	27.9093381770494	-50.0124521688693	-4.24695078595224	4.70917186903723	12.3181071841728	-26.3548830243776
134__a550817.4325015.052018.688_F11.CEL	92.0228543523534	157.663230753481	-16.9086479917771	44.1840233213769	17.2332415648484	-13.4703595938836
135__a550817.4325015.052018.688_F12.CEL	47.1354295623068	-58.0911589826502	21.8083728765086	5.88697307953242	10.440124770163	-10.5853042027607
136__a550817.4325015.052018.688_G03.CEL	78.4543165929738	115.035545921652	-13.6994799004342	16.8710689738647	13.3316185892033	-39.2661012480605
137__a550817.4325015.052018.688_G04.CEL	53.213934969904	-67.6112128936312	-8.82529589579292	-3.0480368105351	-1.27243091407203	0.615510883573046
138__a550817.4325015.052018.688_G05.CEL	63.0527933315187	-29.8904130454858	-9.11539201444409	31.5764033715103	-2.24888297983958	-5.21717535524957
139__a550817.4325015.052018.688_G12.CEL	72.0220832805853	143.693288671369	-18.0015634326035	23.0435014916432	4.79407667986982	-15.0175011638945
140__a550817.4325015.052018.688_H01.CEL	68.0177399722051	131.89880134759	-24.5513755065328	28.0361567387476	21.7045980829445	-26.9976740681815
141__a550817.4325015.052018.688_H02.CEL	89.5608440384472	118.930002835034	-10.2055380695781	33.3424887409083	-1.69588711993011	-32.7831757876056
142__a550817.4325015.052018.688_H04.CEL	64.6060575197993	-36.9894983903147	-29.5047792232717	-10.5359773426828	15.5425902248822	-13.5367571611152
143__a550817.4325015.052018.688_H12.CEL	99.4679744491772	135.922478489878	1.95506530963266	30.9741607555478	-10.3415118212207	-9.73426379652105
144__a550817.4325015.052018.689_A08.CEL	69.9840379782552	-39.4158262431521	14.2203040416643	-9.08824145158751	-8.616091561837	-47.3575411079145
145__a550817.4325015.052018.689_A10.CEL	-131.546795536988	0.957652800018116	74.8234418189179	27.3310585259782	39.6382419937497	75.3624012173607
146__a550817.4325015.052018.689_A11.CEL	-92.5199971419069	18.6108306154281	47.4911539533002	32.4502757109592	28.4308152055389	61.7993801832962
147__a550817.4325015.052018.689_A12.CEL	23.7084679705653	79.0943144597157	31.155568150053	-88.9301636346375	16.1323497010604	18.7268855937408
148__a550817.4325015.052018.689_B03.CEL	12.3847207739976	103.017768923381	48.1926309525323	-72.3228200576516	16.4645839553711	19.0641548357348
149__a550817.4325015.052018.689_B06.CEL	29.5278059303732	-37.0583826806415	47.4481583670405	-79.2110640998625	-45.3233103450556	10.9492711851221
150__a550817.4325015.052018.689_B07.CEL	15.8985639084173	-55.6998742170041	21.641027358722	-67.2230720356031	-42.3833345564943	-26.8589317137679
151__a550817.4325015.052018.689_B08.CEL	3.61345509588972	-38.7720083510675	36.7616538968556	-97.9362660517846	-72.884600924512	-22.4518176233699
152__a550817.4325015.052018.689_B09.CEL	82.6874890331759	-86.1056949413088	36.1698070616984	-19.4032630591883	3.5726403815558	72.2933093218914
153__a550817.4325015.052018.689_B10.CEL	-57.8277506970427	-2.32900911638071	-152.76225010715	4.72430972167365	59.3283467863573	-74.1672708597581
154__a550817.4325015.052018.689_B11.CEL	90.8733347956181	-78.5077270165203	7.65499836214669	7.41659313655621	4.74570452907315	42.959041752945
155__a550817.4325015.052018.689_B12.CEL	22.22630467728	-54.5008904905284	31.440754249962	-57.0073671389186	-45.9468847123218	-19.3719725762155
156__a550817.4325015.052018.689_C10.CEL	-147.559423619174	-9.63983244499671	67.9919492101254	-29.9308187110192	-4.01823234182355	37.7615461656556
157__a550817.4325015.052018.689_D07.CEL	41.260663034539	97.0015175145782	29.5151198259397	-33.1377684246527	45.0624734427894	7.33347868271885
158__a550817.4325015.052018.689_D09.CEL	-137.704418610323	-26.1421846956844	74.9487868755842	43.1316832269102	34.9755467022064	-28.1998009447945
159__a550817.4325015.052018.689_D10.CEL	-2.03286060593311	-27.9112375335672	-53.1973893388683	57.8606126047716	-38.1655877083106	115.586564531766
160__a550817.4325015.052018.689_E03.CEL	-84.8471736757075	-18.8191012967903	-103.841791053952	-84.6208560304611	15.7214678289319	4.11594018299729
161__a550817.4325015.052018.689_E04.CEL	5.74248244459627	-29.2105741775757	-38.8804578221485	51.8811142424855	-3.95415008545563	142.063515968388
162__a550817.4325015.052018.689_E05.CEL	-58.57688608031	25.8645651297286	-101.292412733251	18.4053820775135	55.289630191579	38.4677590518838
163__a550817.4325015.052018.689_E07.CEL	2.30744503184654	99.8660584554483	75.2845462849821	-60.326867005125	8.96299510320987	0.755999105721689
164__a550817.4325015.052018.689_E08.CEL	9.47592779210846	-3.11241261056586	-61.7562617071349	52.0187125580759	-19.7002753660595	113.069334330467
165__a550817.4325015.052018.689_E09.CEL	-53.3027159878055	122.642915879983	86.4180786996293	-52.3750578152999	41.2617494593163	27.3730908706145
166__a550817.4325015.052018.689_E11.CEL	89.2593860311071	-14.1073374320379	-2.48109261118741	56.3610017465191	-61.7071493853598	-42.9416497183993
167__a550817.4325015.052018.689_E12.CEL	-20.0917081783055	123.448038174927	65.7418446973086	-72.8584282390588	30.7252264549302	31.7507207771852
168__a550817.4325015.052018.689_F02.CEL	59.5000452714701	-48.6266753951787	-2.15702051179311	4.95696266194938	11.3144128284916	-12.4479780736069
169__a550817.4325015.052018.689_F03.CEL	-42.1735578467963	133.532216861571	93.0742950122457	-68.9529174047439	11.0048908456997	19.3307474314131
170__a550817.4325015.052018.689_F05.CEL	19.8132599606011	-27.5413382444395	-56.4842292292279	59.1453792737805	-30.9913353017846	98.0492509762642
171__a550817.4325015.052018.689_F06.CEL	11.9312869923285	-48.1155907392213	-23.1788233202449	30.1400731683421	-10.1091854214101	131.909194585992
172__a550817.4325015.052018.689_F07.CEL	3.67999607452706	-39.6731597582924	-51.5142227780265	38.945431893617	-10.8640692044589	132.494124212773
173__a550817.4325015.052018.689_F12.CEL	-5.71493231233746	119.07675111768	64.8074440154212	-35.8449682281415	27.7709799923931	33.8055725106068
174__a550817.4325015.052018.689_G01.CEL	5.99178025014584	96.2305435956837	63.337673075533	-58.8198321600263	19.3092076972049	11.5076004029516
175__a550817.4325015.052018.689_G02.CEL	-27.4023399550354	136.863654675305	78.01070260406	-67.5947331191656	6.84262119004472	44.2447131852449
176__a550817.4325015.052018.689_G03.CEL	-1.78804510545473	117.654025928094	53.9952974872956	-32.2336593111029	10.8487148408771	16.3751008423115
177__a550817.4325015.052018.689_G04.CEL	80.1050058403673	-5.54409935780145	31.7751186252952	18.071919277901	6.00233845191464	23.0451089545122
178__a550817.4325015.052018.689_G07.CEL	42.0234423221299	-48.1168278867261	-8.56530068449607	-25.6532659184724	37.1496817577758	-31.6971475097326
179__a550817.4325015.052018.689_G08.CEL	2.87975720036219	123.272989086913	71.0613887723721	-65.1837020357349	-26.3306773298632	18.9251081765473
180__a550817.4325015.052018.689_H01.CEL	-73.9258082150973	10.0179071346669	-119.827999568569	4.12858350058844	59.4520298442514	19.9596875061449
181__a550817.4325015.052018.689_H02.CEL	41.9961704455967	-43.2262523898878	14.3463289574201	7.54487539838045	17.786859830896	-14.9331780620684
182__a550817.4325015.052018.689_H04.CEL	75.6366079455923	-20.2953375277831	15.0092916301742	17.2266816167097	-15.6889724187347	-14.0644754966127
183__a550817.4325015.052018.689_H07.CEL	3.34820197054299	109.941989489751	71.5495808816803	-58.217019696784	14.9341093523677	14.0571024375308
184__a550817.4325015.052018.689_H08.CEL	-43.5185069506912	133.16442539782	101.255084915374	-42.5118124351011	-4.21870077464904	13.7494379005894
185__a550817.4325015.052018.689_H11.CEL	66.5458189112108	-32.5063820147099	30.3998995627951	27.958084980735	-6.3875590769404	3.30931332876144
186__a550817.4325015.052018.690_A11.CEL	77.3668520496405	-95.7631360392255	39.79800114492	-9.11281073021324	49.1065055858589	40.4055521926122
187__a550817.4325015.052018.690_A12.CEL	80.3996206379305	-78.3822418296825	28.4346732579833	-11.2588090351559	23.1883495727001	-29.1877915070279
188__a550817.4325015.052018.690_B01.CEL	73.793550254466	-97.5646093719881	28.4882700467153	-9.47848811136649	20.9613359175993	-33.8722575658046
189__a550817.4325015.052018.690_B02.CEL	76.5254138904707	-90.7009556572536	19.4141081288882	-23.0217368331756	37.0002384148638	43.5626108853354
190__a550817.4325015.052018.690_B03.CEL	90.2375372925527	-103.276174563877	32.2073643274181	-1.54064347825104	35.2053820618785	1.85126535433672
191__a550817.4325015.052018.690_B08.CEL	67.5628061289797	-93.0426486529334	41.5160778731267	-17.5520439933305	15.8409234900879	-21.3961019539365
192__a550817.4325015.052018.690_B10.CEL	93.9493807911651	-84.2684439692345	32.6874715525287	-29.1241728621683	-0.547872568416386	-6.27516598816845
193__a550817.4325015.052018.690_B11.CEL	70.7014764273281	-104.137660040623	35.0874164078427	-13.0469484314243	36.4315859717983	4.09664855135187
194__a550817.4325015.052018.690_B12.CEL	60.4495761456231	-104.117128552231	42.1820629445529	-22.2183417730196	48.2319189864606	7.12806274028797
195__a550817.4325015.052018.690_C02.CEL	69.019252607427	-95.6800611578405	50.0392821512562	-25.73641488375	50.1436603552923	0.850412494502424
196__a550817.4325015.052018.690_C05.CEL	66.174178111864	-106.498994553551	50.4334265207191	-6.37451141041168	26.3583039234973	-26.5958834664745
197__a550817.4325015.052018.690_C09.CEL	71.8565854846739	-104.536065499022	32.6278040863253	-37.9278392558898	48.1899341201441	-19.9644650052893
198__a550817.4325015.052018.690_C10.CEL	76.1617116286648	-100.147765302614	32.275617922458	-14.5543452782192	35.4475396017238	0.739259877601265
199__a550817.4325015.052018.690_C11.CEL	96.2344312654377	-79.2212760282346	36.3385500786579	-16.7200854184354	13.2301285047127	-4.28684992434457
200__a550817.4325015.052018.690_D02.CEL	76.7214919979827	-93.4231417641724	40.1888567268222	-34.8771104690281	47.6262457757298	-47.5071155347698
201__a550817.4325015.052018.690_D07.CEL	60.6262038234855	-115.067249199437	48.0852506829781	-1.49634678093883	33.8371119627203	-2.51396318881529
202__a550817.4325015.052018.690_D08.CEL	73.5847392107844	-96.5522365208525	32.5599046369447	-5.4775872207199	19.8440569602878	-19.1205995646685
203__a550817.4325015.052018.690_D12.CEL	62.1289882654627	-95.9386246420273	48.706677730729	-39.2309069084625	26.9456947951103	-18.952003141913
204__a550817.4325015.052018.690_E02.CEL	66.0050391198098	-105.839734335972	36.2119015850479	-9.96979509262428	53.7889921697785	21.2132777000607
205__a550817.4325015.052018.690_E03.CEL	88.089118447419	-98.6617137052954	49.5637659034987	-12.2774587082141	40.9894469190899	-8.39799100728211
206__a550817.4325015.052018.690_E07.CEL	64.8361153148064	-108.379933173752	33.5055127503193	-23.4745417655377	42.2945360536841	-20.0535067968273
207__a550817.4325015.052018.690_F01.CEL	-169.448171796228	-1.82985946292783	76.8114581238734	62.1828518895052	-20.0179039590196	-46.1976869727796
208__a550817.4325015.052018.690_F02.CEL	-166.86086243428	-15.0578505167748	83.634668930956	49.1927848327624	33.8503731055037	-27.5784511516771
209__a550817.4325015.052018.690_F03.CEL	-173.683246023198	2.54618638840324	85.726521051559	27.2925372388824	14.92910363261	-46.5259760648598
210__a550817.4325015.052018.690_F05.CEL	-167.173286339185	-17.2952569649815	98.8486750417142	61.1539564721127	14.5235428792584	-41.15704043357
211__a550817.4325015.052018.690_F06.CEL	-167.833372301111	-17.1779477714957	55.6088295372271	65.1896710157787	-17.0404692103124	-53.0761291996427
212__a550817.4325015.052018.690_F08.CEL	-162.256780999528	-11.5205497008589	91.1857709913727	8.95388740692889	34.1307915491777	-24.0892060981912
213__a550817.4325015.052018.690_F12.CEL	58.2149412269763	-54.6690927039941	42.0848821281571	37.5480543231526	25.029019279593	21.950605593752
214__a550817.4325015.052018.690_G01.CEL	53.1603941018963	-63.9391755427672	0.78101536396218	11.2251851725508	2.99565775246589	23.3648350866632
215__a550817.4325015.052018.690_G02.CEL	54.3788728015677	-48.1891634783174	15.7589191297174	13.2925837693421	-5.70531182527659	25.7723326051461
216__a550817.4325015.052018.690_G04.CEL	79.4791109972009	-87.8709676116647	34.3345496280559	-14.5332715243179	57.6430301852891	10.4101189132595
217__a550817.4325015.052018.690_G05.CEL	-163.247277724659	-3.79013461176439	73.7667156654518	57.1828233583783	27.818186529445	-55.7308377721116
218__a550817.4325015.052018.690_G09.CEL	-154.109799252561	-28.4818474128413	100.685881721743	38.1761065895628	24.3892251782069	-7.07238626730895
219__a550817.4325015.052018.690_G10.CEL	-141.617737939658	-13.3738150938624	72.6116948772884	69.9645222575694	17.2049343092186	-41.7537730280826
220__a550817.4325015.052018.690_G11.CEL	-159.473505085919	-6.23476082505439	99.3878835687839	55.2827427299103	29.3446313948886	-29.1709659997038
221__a550817.4325015.052018.690_G12.CEL	53.6868435742522	-33.3359647188447	21.4656630155308	22.4407684079598	5.59808654138498	36.3202480100158
222__a550817.4325015.052018.690_H01.CEL	61.9223463814107	-61.1023641892649	32.4243244994848	17.4416492087011	-8.58540492713756	36.1826484173709
223__a550817.4325015.052018.690_H02.CEL	-165.868677357243	-20.6141585167824	72.5383842340338	54.5127907975697	30.7444266058269	-36.3367278800211
224__a550817.4325015.052018.690_H04.CEL	-178.60840703882	-22.8479463157408	79.5905648473749	75.4604359405219	2.61934530934524	-40.923790639412
225__a550817.4325015.052018.690_H05.CEL	-158.020582072922	-8.1537589474014	76.9009938669495	69.5311249925536	-12.0720569893446	-33.4603220126229
226__a550817.4325015.052018.690_H07.CEL	-159.167338591291	-18.2434560945666	83.3283328461768	76.2025396411275	22.3094504502943	-24.7086979570896
228__a550817.4325015.052018.691_G10.CEL	-90.076446713367	-20.1983217347638	-117.807020918567	45.3116978116192	21.7324778068096	22.8720894514397
229__a550817.4325015.052018.692_A02.CEL	-60.3426786285013	17.2304357113621	-135.847779856859	57.1173004988385	3.19263381803371	-11.0647819963432
230__a550817.4325015.052018.692_C08.CEL	-75.5980710835172	-19.7519747184892	-124.28696948608	29.5817322465872	-3.19740845471779	-0.974814431017968
231__a550817.4325015.052018.692_E03.CEL	88.0527713501247	124.578373091166	-11.397520747489	7.67056948358721	-4.08022781057999	-46.6296628479651
232__a550817.4325015.052018.692_E04.CEL	82.148929255742	140.593532467574	-19.6758568570635	25.6718232197347	3.78589786714285	-23.8457179613788
233__a550817.4325015.052018.692_E05.CEL	69.9362134404977	142.311615737035	-8.50044410793969	28.211601873531	-6.06148377014208	-20.9316533358051
234__a550817.4325015.052018.692_E07.CEL	69.8521360105328	138.714595476155	-9.09206387925584	21.0689518365535	3.08133779538169	-31.502959991544
235__a550817.4325015.052018.692_E08.CEL	65.2510837100385	173.994350462222	-22.7661027689656	23.7886828043955	16.9251989307583	-18.6967790154741
236__a550817.4325015.052018.692_E10.CEL	76.5645150082224	137.281266806342	-8.19960016286973	39.6282807088155	6.61825179136861	-7.89176251254681
237__a550817.4325015.052018.692_E11.CEL	81.1961520917316	117.935147604429	-2.57941809744869	11.8418055292361	13.2860115324326	-21.6704505171737
238__a550817.4325015.052018.692_E12.CEL	76.3052173084048	128.048692553248	-21.0816201791155	29.7437798607823	21.5802759667898	-15.6648923209075
239__a550817.4325015.052018.692_F01.CEL	95.0115888852722	125.460282170797	-21.6189964627136	32.9346208085651	2.85470768175863	-23.7627338126348
240__a550817.4325015.052018.692_F02.CEL	83.6681383414354	133.449684534098	-1.83224552912573	30.2661805950928	13.5246242828754	-17.2463859301305
241__a550817.4325015.052018.692_F03.CEL	77.4346220174585	123.652836746557	-18.8861585580392	16.6123055552815	20.5093383732064	-30.6463261806336
242__a550817.4325015.052018.692_F04.CEL	80.0432809848131	130.066459363332	-14.1636946224529	38.4015396046852	-1.58619368248018	-24.7448035044363
243__a550817.4325015.052018.692_F05.CEL	80.016688176758	162.502838700264	-13.3285624322306	32.2267281372069	-0.381241394852445	-23.6002738787741
244__a550817.4325015.052018.692_F12.CEL	78.7777284375535	131.119709578437	21.4059599371754	28.2734692283054	5.88567889835701	-21.3526170343908
245__a550817.4325015.052018.692_G01.CEL	81.2854184084516	120.712771387061	-7.59981354265985	12.8790029964278	20.4040657830427	-38.6430163221825
246__a550817.4325015.052018.692_G02.CEL	85.4106125886949	128.506432166855	-4.61922656208993	23.3285238155775	2.81706878760968	-16.6120334271639
247__a550817.4325015.052018.692_G03.CEL	83.2003755097614	158.029899220829	-18.2390376493357	42.0533019491554	-5.78027925226804	-35.7935521875987
248__a550817.4325015.052018.692_G04.CEL	-11.887689399231	70.4906394992492	-168.887789312396	47.5240624517646	2.46468336518028	-42.9789333604239
249__a550817.4325015.052018.692_G05.CEL	82.4478978737513	149.453763814347	-28.6116655588745	28.1064654838681	11.8608818150618	-2.74615730153471
250__a550817.4325015.052018.692_G06.CEL	92.5733807780861	144.064836025067	-14.7830870396964	34.1963702262434	8.96596864215217	-18.8974404817614
251__a550817.4325015.052018.693_A01.CEL	71.306800051404	159.86210940759	-7.04992441654166	37.6223623430463	-7.2994390649074	-23.0104607127838
252__a550817.4325015.052018.693_A02.CEL	75.2392686005175	145.68275259509	-26.003715670758	34.1524497622923	15.9192402702257	-38.5944689430233
253__a550817.4325015.052018.693_A04.CEL	84.4182140624207	151.060881238434	-9.2389272180031	43.0223892083315	-2.42144534872077	-20.5641134831082
254__a550817.4325015.052018.693_A11.CEL	53.9771724958029	-31.592460825064	-14.2319682960886	-3.05138453257093	-9.34774201085511	-23.0340869886443
255__a550817.4325015.052018.693_A12.CEL	79.9708730683019	114.271045615047	-11.5691869617346	16.9904735785172	-9.57360471888117	-34.4107832656048
256__a550817.4325015.052018.693_B01.CEL	92.4761076815125	118.412930584183	-9.72926327803147	21.0231535447877	6.7379368597706	-38.252122606966
257__a550817.4325015.052018.693_B03.CEL	36.0435978934101	-57.5787362568845	-20.2337934292374	33.1841555232409	-6.67987957772982	-14.4818316913482
258__a550817.4325015.052018.693_B10.CEL	90.6604126092999	124.974155079972	-25.2416238575261	24.5073711402743	16.3993251145767	-21.2563997969113
259__a550817.4325015.052018.693_C02.CEL	75.4311600494664	126.447051702704	-12.0979248554026	29.9489580495837	13.0981217047627	-31.7471114765096
260__a550817.4325015.052018.693_C03.CEL	81.5268848769264	141.779420400949	-11.9771709300435	25.508284179247	14.5863804265604	-14.6682230386228
261__a550817.4325015.052018.693_D02.CEL	83.0989925517445	137.807874412559	-15.9294146051528	28.7231522795011	8.84008672884773	-28.8623794031622
262__a550817.4325015.052018.693_E10.CEL	52.9132964081683	-66.0941004146202	17.2952870497246	31.9297686037369	17.2998938385873	40.6511756472025
263__a550817.4325015.052018.693_E11.CEL	37.7685330564857	-78.64159382269	26.2101689931388	7.61246948390882	33.9416385003335	45.0074335265921
264__a550817.4325015.052018.693_E12.CEL	-179.896471723972	-6.21427036307845	67.2646389794172	55.3841339975179	3.3539940807924	-50.3405075215667
265__a550817.4325015.052018.693_F06.CEL	94.2245704837962	-10.8627255272714	-15.8991023122455	53.137400139956	-93.0587747049469	-38.6819377091025
266__a550817.4325015.052018.693_F07.CEL	98.6096130153677	-66.3737096403716	19.9502262494311	14.2278869466434	0.0780305600738363	42.5247124374454
267__a550817.4325015.052018.693_G04.CEL	-17.934382506665	9.0199475303159	-73.3915425418744	76.8368732459951	-97.9637708850041	40.0906434056281
268__a550817.4325015.052018.693_G05.CEL	61.3086471857675	-41.3581052664623	4.74810420420877	-29.3496344039969	11.125678349749	-34.3795550094881
269__a550817.4325015.052018.693_G11.CEL	56.5391901917976	-42.7841922759399	21.4239591848063	13.0861943484443	-14.0265527513345	-22.7793867638335
270__a550817.4325015.052018.693_H01.CEL	-6.51394323160584	13.9180028399071	-15.2827779536849	1.74100895524641	35.8567331974733	68.9065851899054
271__a550817.4325015.052018.693_H02.CEL	-164.524965613715	-12.3915273370451	89.1181002824776	25.1950176600155	12.0491013667654	-39.1721057981175
272__a550817.4325015.052018.693_H03.CEL	-163.340433910864	-10.1635221196943	91.0365525466447	45.6409091757391	3.65425842146646	-69.442528135361
273__a550817.4325015.052018.693_H09.CEL	73.2638393296736	-8.6751154587505	28.5437944719571	-10.723096574347	-16.5601816331311	10.052099550242
274__a550817.4325015.052018.693_H12.CEL	66.5404967235116	-13.0752105254739	17.8400627038432	35.1378504488547	-35.7218563713568	-5.26322166645633
275__a550817.4325016.052018.796_A01.CEL	-66.1678224704215	19.9749448951699	-102.149190306238	-16.2786617026216	69.6254773636282	28.5428261651352
276__a550817.4325016.052018.796_A02.CEL	-54.8660048356532	-0.0495287450703983	-94.1568547298553	-3.71035250902008	66.9526036486695	12.7572135409299
277__a550817.4325016.052018.796_A03.CEL	64.7218923535939	-51.7101450676166	5.62990446617003	17.4107553885511	30.93472335016	-13.1369464819822
278__a550817.4325016.052018.796_A04.CEL	87.4329866766118	-3.49361574630012	27.7549155721081	8.00499666512414	-14.0224637934084	24.3607513574292
280__a550817.4325016.052018.796_A07.CEL	59.5819560845312	-39.0605345349472	13.4995560923959	-28.3580200318076	25.887531055545	-23.9253593488202
281__a550817.4325016.052018.796_A08.CEL	63.1476225922313	-49.9829337553689	19.9554410429182	18.7929207796878	22.8201375402237	11.8069299432216
282__a550817.4325016.052018.796_A09.CEL	-75.616070357012	0.316057152882465	-105.931970002324	8.78452854075849	60.0854713865837	5.82101540433671
283__a550817.4325016.052018.796_A11.CEL	-71.639618954314	8.9618114268619	-98.1042124985278	-4.89447759527248	55.51517464156	26.922700799517
284__a550817.4325016.052018.796_A12.CEL	-57.3179973848166	36.3503264107098	-121.248683710876	9.28766973442466	41.8314802630419	16.5460104303151
285__a550817.4325016.052018.796_B01.CEL	-15.1677200955538	111.894990342091	62.7718518009823	-55.2785010726084	27.9866244594816	-1.54836787006389
286__a550817.4325016.052018.796_B03.CEL	-9.74242574389954	-21.7318439187174	-45.5632129655819	66.9394898819137	-11.9717520445416	141.491184870238
287__a550817.4325016.052018.796_B05.CEL	82.0462968135339	-18.5008271876536	-21.3206603517582	52.9651184843264	-83.1888752811787	-48.1727698506977
288__a550817.4325016.052018.796_B06.CEL	-109.56621647065	6.45424307492026	-92.8702916958384	-113.270730676975	-51.0949753574676	36.8846805779068
289__a550817.4325016.052018.796_B08.CEL	-88.384714491423	-0.0187683780669895	-84.866654483156	-100.784278561495	-2.79187374212729	18.7975561075568
290__a550817.4325016.052018.796_B09.CEL	2.5116298571965	-30.479872660621	-42.8484319931604	53.7124298964567	-15.4616330080552	123.566304687803
291__a550817.4325016.052018.796_B10.CEL	-109.294413019106	-1.96711068134869	-85.1038366467564	-105.022349441964	-63.9752506188262	10.2877801868325
292__a550817.4325016.052018.796_B11.CEL	-99.0825658301287	-20.5727458100896	-97.925259438754	-86.5545226331788	-20.4423714376751	7.52951783628332
293__a550817.4325016.052018.796_B12.CEL	-106.090091279089	2.2821838025523	-102.211458140266	-114.604129513866	-44.0607070406175	-15.4801580988395
294__a550817.4325016.052018.796_C01.CEL	21.2856760904785	-58.0217235465249	-62.4831036247192	-12.5588551937585	42.7178192943807	-45.7689368354503
295__a550817.4325016.052018.796_C04.CEL	87.4478922958364	-30.5944414056123	10.2688031246873	53.7952317552532	-63.9404688593249	-3.44189369238586
296__a550817.4325016.052018.796_C06.CEL	33.4569805507971	-41.1580081988266	-92.1524677415111	2.92558605954502	7.26564642296152	-15.6125142460203
297__a550817.4325016.052018.796_C07.CEL	32.5676247564158	-79.2379017597112	-11.5308071135816	30.3316905673942	6.86745175667975	-51.4641484959825
298__a550817.4325016.052018.796_C08.CEL	84.4173052423961	-23.9718992242982	5.5507931453509	58.8527109383382	-70.1461389782608	-21.8347895094881
299__a550817.4325016.052018.796_C09.CEL	-66.6623728392048	-5.76045036238774	-158.653164919742	1.44079011174149	61.8862244799595	-5.81280262409726
300__a550817.4325016.052018.796_C10.CEL	-117.676483514578	3.08028368226038	-103.791838571091	-85.7440823417268	-15.2560496769986	15.4693270845879
301__a550817.4325016.052018.796_C11.CEL	66.9454480416393	-27.0365001124301	-4.10332572156102	61.2356661622486	-74.9621202776409	-29.7014666492196
302__a550817.4325016.052018.796_C12.CEL	25.1337340183179	-39.6799679950256	-76.0838418948768	24.8328901396752	18.9777667450044	-29.1318421139779
303__a550817.4325016.052018.796_D01.CEL	67.8789523210295	-28.1473543433003	5.51920475753116	39.8866052660258	-78.4474858983726	-13.1465207966153
304__a550817.4325016.052018.796_D03.CEL	34.2237464523487	-86.8140450361843	-10.1029084317055	7.28952869830292	-11.8858302327994	-64.7577524444136
305__a550817.4325016.052018.796_D05.CEL	-119.483768577642	-13.0011257219125	-107.27661502703	-81.3720848937328	-50.5431901919086	-2.37822942834237
306__a550817.4325016.052018.796_D06.CEL	18.6889366026652	-25.1672762608029	25.4836520579469	-95.7844740053049	-84.3763782918205	-37.8566355386607
307__a550817.4325016.052018.796_D07.CEL	-75.530356341885	-22.6008984138409	-92.2643086292873	-98.0362232250955	4.76866271370671	0.660857117799599
308__a550817.4325016.052018.796_D08.CEL	86.5972594563158	-16.8988496037577	2.36897505631946	55.8964693866012	-79.8580409743679	-27.4967828178242
309__a550817.4325016.052018.796_D09.CEL	89.6292632109104	-34.7341428035056	-6.69197744357853	72.4285094234494	-81.7003261320201	-17.9655698809968
310__a550817.4325016.052018.796_D10.CEL	-70.6129247266613	-17.7506822894996	-91.4075577672423	-94.9068990295248	34.823707667338	33.4214504965116
311__a550817.4325016.052018.796_D11.CEL	-106.132926251702	2.90922081774966	-100.987735189522	-73.3394687412125	-36.9092639506071	-0.611414102480355
312__a550817.4325016.052018.796_D12.CEL	-61.2122463342452	-18.4689184968654	-91.7484504153395	-83.8831125452449	36.1419478226019	12.7248184913928
313__a550817.4325016.052018.796_E01.CEL	-100.886079302448	-18.0413413768938	-86.2734720209885	-102.931049260236	21.5324991762827	24.0321700588058
314__a550817.4325016.052018.796_E02.CEL	-105.821802241406	-13.4340238491048	-101.860131135081	-68.0954214713102	-41.390545125145	0.374060742556663
315__a550817.4325016.052018.796_E04.CEL	67.8503808938129	-24.313305593945	12.3574765702122	60.8447739029211	-81.8085306445866	-16.6665078730065
316__a550817.4325016.052018.796_E06.CEL	-115.547576022069	-9.02577033393836	-101.718172282445	-85.5562440821814	-41.0515414303001	25.4812489885985
317__a550817.4325016.052018.796_E07.CEL	-117.874098247519	-3.39317048596249	-93.9363102322938	-99.6549897375126	-51.9884177114283	-4.25900138434743
318__a550817.4325016.052018.796_E08.CEL	6.45865865052061	-52.8501534420413	-84.8993631361571	25.7146300153217	-2.57361219560004	-4.12023467499937
319__a550817.4325016.052018.796_E09.CEL	-68.4448353395774	-2.84965104623273	-93.9260158035351	-77.6123694756268	-17.0219844390032	-9.16116042334383
320__a550817.4325016.052018.796_E11.CEL	116.944747020403	-3.06428385213881	4.49844629386206	35.5381598048732	-58.7365540719676	-12.020084137288
321__a550817.4325016.052018.796_E12.CEL	-107.790620590766	-5.65458083928929	-100.425647194124	-103.495922088898	-48.2215908704859	10.8441027996454
322__a550817.4325016.052018.796_F01.CEL	84.4360714476378	-38.3456215822063	-6.45634249921514	66.8405870088115	-87.0830767549192	-20.5737199435409
323__a550817.4325016.052018.796_F02.CEL	-105.585030246753	-1.06997092068397	-84.7977189456379	-89.0643052230298	-43.4077143972674	-9.21908030574188
324__a550817.4325016.052018.796_F03.CEL	-103.686809802704	-6.37528827362847	-97.3622446239189	-93.0636778902647	-39.5115948594508	0.530687281441945
325__a550817.4325016.052018.796_F04.CEL	-95.1655420881348	-2.59546294580663	-88.9070970641238	-88.5444561157967	-30.8956685441974	-6.58533805914668
326__a550817.4325016.052018.796_F05.CEL	6.02098338006393	-60.3655544740015	-76.6335019107853	-10.3283188806653	-4.80142987001458	-78.7683376109102
327__a550817.4325016.052018.796_F06.CEL	85.0959374944851	-18.6777281082252	-13.099415557375	58.1679215036149	-59.2952051322764	-9.44838182941203
328__a550817.4325016.052018.796_F10.CEL	0.291490005893878	-39.9044526766801	-70.6728035075895	-22.9279590777461	34.6571045526633	-50.294822096858
329__a550817.4325016.052018.796_F12.CEL	4.58309436732311	-59.907668328784	-81.149922892872	-11.181236060376	21.1598062863839	-32.54976538873
330__a550817.4325016.052018.796_G03.CEL	21.4558808157579	-45.8043362293882	32.2506201631013	-85.4236418549567	-56.7931592287898	-14.3909276032591
331__a550817.4325016.052018.796_G05.CEL	27.147245586529	-62.8656280154659	53.4040741412202	15.2726078645662	5.44403910514592	-67.0804885660904
332__a550817.4325016.052018.796_G07.CEL	92.5484810500803	-67.7572342566418	3.17269692487065	8.70586407939411	4.73497689282104	39.8503982922366
333__a550817.4325016.052018.796_G08.CEL	19.3292315537677	-36.7334340140006	6.953221181801	-91.5401564499293	-73.7511620337077	-16.2200915948047
334__a550817.4325016.052018.796_G09.CEL	36.1986533916738	-67.3198384214181	19.1735923322745	-82.1989809419597	0.37609592001133	-11.1073086444251
335__a550817.4325016.052018.796_G11.CEL	-0.171153493049133	-71.7892716537176	24.6591130868796	18.9755216886773	-20.5258238004826	-115.399696262122
336__a550817.4325016.052018.796_G12.CEL	-70.2887528053566	4.95863754861865	-156.438289527797	-2.08067741135666	54.7074272225203	1.78555599169886
337__a550817.4325016.052018.796_H01.CEL	103.53237012917	-57.2629517871199	3.72604856491601	9.59220696045374	-0.814283205154146	50.4485673091476
338__a550817.4325016.052018.796_H02.CEL	-54.9262301512635	-4.45724975803225	-174.72316039253	9.90142154918451	24.2791338350765	-44.2130253983475
339__a550817.4325016.052018.796_H04.CEL	-40.4986234831243	6.26822703220181	-148.067132591059	-18.4414027677146	70.6556050086972	-15.4977601158205
340__a550817.4325016.052018.796_H05.CEL	-38.8498594551772	3.03040698274615	-153.824252933588	3.31386257199008	35.2425274626173	-26.0798044566309
341__a550817.4325016.052018.796_H06.CEL	6.61421360460664	-59.7902522791471	32.6796690899234	24.1460758105681	-24.3548092925618	-75.4136635885938
342__a550817.4325016.052018.796_H07.CEL	79.5972241449429	-57.7629567335171	-18.2936915157907	4.86926376556691	-6.41609527821536	64.6126115240958
343__a550817.4325016.052018.796_H09.CEL	0.806694603743261	-78.3416218135962	54.0952649661374	55.3650609138543	-11.688417655441	-50.1666364933782
344__a550817.4325016.052018.796_H10.CEL	11.6975040438475	-67.0582954066077	37.9563773079915	12.150798350724	-37.0824183298857	-94.2231189891399
345__a550817.4325016.052018.796_H11.CEL	11.5014530831213	-72.3346904427952	13.4669275221213	-42.2317802368551	-41.8622204233624	-39.416650599363
346__a550817.4325016.052018.797_A01.CEL	32.9072447176024	-60.0843201021276	10.625818717513	-94.2221784518452	-43.1542934520785	-43.3639492725297
347__a550817.4325016.052018.797_A02.CEL	-15.1245568863061	-67.9647224847488	33.5465524218975	55.9779451154401	-18.4124033739715	-68.1511176879969
348__a550817.4325016.052018.797_A03.CEL	8.59395557219966	-71.822163859836	39.5472039513027	57.1384557559657	-37.2368538609228	-47.2788157339587
349__a550817.4325016.052018.797_A04.CEL	10.2870830095861	-64.2796464573299	29.0470310866925	21.9297479056873	-0.499885853634054	-83.5646998630475
350__a550817.4325016.052018.797_A05.CEL	82.5666296947901	-56.4352932078877	10.983041839442	12.6287977149211	15.9033834701194	42.6890075846695
351__a550817.4325016.052018.797_A06.CEL	-6.47581873183682	-70.6689370529971	4.19671575037311	46.2786968893566	4.31835054869915	-83.1670887477167
352__a550817.4325016.052018.797_A08.CEL	-61.3010001845775	0.939611097148665	-153.439974599731	-14.4570365369936	64.9334343574779	-33.9560914835181
353__a550817.4325016.052018.797_A09.CEL	-59.4692354119544	13.6454058929681	-157.284246539274	8.23940244404952	54.5170981321089	-49.7306414271627
354__a550817.4325016.052018.797_A10.CEL	15.6956670971174	-48.2258107503349	47.1189301484468	-82.2875805679963	-83.7209432724517	-17.2342504233456
355__a550817.4325016.052018.797_A11.CEL	-55.5483583010679	0.0418492369085016	-156.791853930407	5.17429534909888	51.3300971118448	-34.2458411258099
356__a550817.4325016.052018.797_A12.CEL	-48.2745384933513	-2.87230802950092	-145.680651807748	6.94006355681972	64.0875331366953	-49.4286606638796
357__a550817.4325016.052018.797_B01.CEL	-26.825427201565	15.9855431909652	-161.305339587616	-3.22001235212105	44.1674064744703	-25.2237145213631
358__a550817.4325016.052018.797_B02.CEL	-62.1651719079375	1.84955945353536	-151.81103753573	14.2647384040542	61.4051243784051	-44.2463742335482
359__a550817.4325016.052018.797_B03.CEL	-3.46747935470652	-67.7526422726791	6.91405489175222	10.5466667013103	-24.6272556110076	-102.411553530559
360__a550817.4325016.052018.797_B04.CEL	59.7659691803184	-77.0777043282341	-3.3180303563355	3.60118881909305	5.73501302665064	22.3348588643842
361__a550817.4325016.052018.797_B05.CEL	7.7210255971805	-41.1829803913923	12.4215248619936	-82.7863235133933	-80.0607496104327	-8.97289855239476
362__a550817.4325016.052018.797_B06.CEL	85.8259490327861	-68.5141226988693	-4.04721127621284	6.81179281760824	-5.83828034988556	57.8302396368426
363__a550817.4325016.052018.797_B07.CEL	64.7995015364812	-73.3131645462274	3.31635854028863	-6.71299567392079	27.5194294708932	45.1832212367797
364__a550817.4325016.052018.797_B08.CEL	-39.2992951528166	11.7561987616344	-144.862149988637	15.6510781013129	43.3608157071705	-76.4549144443307
365__a550817.4325016.052018.797_B09.CEL	105.516892540237	-49.9224768799182	-2.72305098736412	-2.02352916761467	-17.4745333536678	22.0482292737684
366__a550817.4325016.052018.797_B10.CEL	1.8197816133437	-69.8270913973093	31.5886522679995	53.125288179138	11.6710111514253	-61.0800994684728
367__a550817.4325016.052018.797_B11.CEL	73.065431199041	-72.1798738315336	22.7896569433622	-21.6403554796884	14.7703369680852	36.7681985756661
368__a550817.4325016.052018.797_B12.CEL	16.6023802964746	-38.2536161636673	0.161074236580513	-83.3458098863783	-67.5060834136694	-16.2667999710627
369__a550817.4325016.052018.797_C01.CEL	24.2355916970572	-52.8219649012963	6.89562657964317	-81.98452390337	-50.8598153170624	6.34821863629523
370__a550817.4325016.052018.797_C02.CEL	19.7977892166827	-26.1948733288773	-56.745577342641	41.4144095638835	-14.3605814434886	145.951005594637
371__a550817.4325016.052018.797_C04.CEL	12.1474552283712	-51.5322005152581	42.0908154905822	-115.139387439462	-85.5074889232674	1.54451167600696
372__a550817.4325016.052018.797_C05.CEL	71.4218181997075	-71.8407584638156	19.3147721370036	-2.58346357070477	23.2996464290383	58.5156179769626
373__a550817.4325016.052018.797_H11.CEL	77.709335169808	-94.3805024215524	14.5406265274797	-28.0417409026849	22.181274915721	-17.2646411876846
374__a550817.4325016.052018.798_A04.CEL	-140.093130051052	62.1916883630784	94.6368571770187	-64.3130308791358	-1.04081327581251	47.0392979760668
375__a550817.4325016.052018.798_A05.CEL	-148.722663780478	8.35380525648223	90.0465904713954	2.91053652651342	1.46870228562959	-18.0950805003016
376__a550817.4325016.052018.798_A06.CEL	3.72313477243658	128.409159803977	57.0923220422634	-52.4473483359444	-8.8141472218966	15.9250704969625
377__a550817.4325016.052018.798_A07.CEL	-18.7630124905073	91.8657184395127	74.2226594675662	-65.2320539405249	26.9068512455945	30.1737959664336
378__a550817.4325016.052018.798_A08.CEL	-22.6687304255594	121.209878329925	75.7085089491016	-59.4493035069353	36.0770665951426	26.5133584485726
379__a550817.4325016.052018.798_A09.CEL	57.8858746759076	-4.84940827775242	19.2585626966317	-5.0615868990909	-13.2165232768065	15.363349826704
380__a550817.4325016.052018.798_A10.CEL	75.6758047408471	-7.72596497969705	14.5899305767972	-18.109486599364	7.83708600062302	-0.956188985352366
381__a550817.4325016.052018.798_B04.CEL	33.8128747949445	-37.6287036554477	-68.7031000919484	-25.8675984660188	16.7897765869118	-21.0381985484197
382__a550817.4325016.052018.798_B10.CEL	66.6878768899816	161.896364380057	-7.52900882435682	21.5262360290861	13.5822493336568	-20.459380367505
383__a550817.4325016.052018.798_B11.CEL	79.2414518392726	162.007207920568	-13.136378361864	32.1862242289332	-0.810961247043177	-23.1905203016759
384__a550817.4325016.052018.798_C01.CEL	77.2254236693233	120.043301116203	-10.4696599288695	22.9876410771599	29.071243127052	-42.1079992664349
385__a550817.4325016.052018.798_C02.CEL	75.2569752483772	135.354313250885	-14.1390837603789	23.1307966485384	0.461247674269192	-34.3317779935465
386__a550817.4325016.052018.798_C03.CEL	84.9140864151644	129.115586548575	-5.13398564887386	20.1418625284622	14.3426011701624	-33.68465961654
387__a550817.4325016.052018.798_C04.CEL	72.5392651566693	143.343723715728	-29.4780239022046	20.5996244473217	13.7334101160444	-50.5694304636547
388__a550817.4325016.052018.798_C05.CEL	7.83380005944553	64.7716189759383	28.478152111276	44.8336141466533	-14.5244377532438	-50.3730651697474
389__a550817.4325016.052018.798_C06.CEL	97.2156984216944	120.90866988765	-15.3169018255605	17.1055434882057	-0.297980533869577	-33.8677857784015
390__a550817.4325016.052018.798_C07.CEL	13.0979625564248	-36.6067146745841	-49.5610629172848	51.1330806807053	-37.7263578754746	26.0508875411675
391__a550817.4325016.052018.798_C08.CEL	8.84092441075393	-56.5758744148509	28.2696399274056	29.7327658096002	-27.7842479593515	-67.2013490768078
392__a550817.4325016.052018.798_C09.CEL	28.276738974445	-51.0063165196556	-66.6695054734214	15.4473498458767	19.8987333266368	-43.6339572141597
393__a550817.4325016.052018.798_C10.CEL	-128.316190634609	16.2860280039828	-74.3433717621916	-47.2082581851304	-60.9406474397707	-17.0308497623018
394__a550817.4325016.052018.798_C11.CEL	-86.0224949057449	-5.33806252258885	-97.0626476250165	-92.1156866697899	20.3320516596751	10.546291752421
395__a550817.4325016.052018.798_C12.CEL	-101.831409180421	-9.16450590688639	-81.7049141201544	-101.271694733078	-24.397128454018	2.90325944382231
396__a550817.4325016.052018.798_D01.CEL	-98.0387882076096	12.2796531603016	-86.5782580870058	-79.6720212576848	-43.1290088491303	15.1313718341383
397__a550817.4325016.052018.798_D02.CEL	13.6566030600629	-36.9923589036747	-40.819764063198	35.0850535827883	-23.3796265881585	110.108630717667
398__a550817.4325016.052018.798_D03.CEL	-30.0349706662743	1.47838991159596	-47.4335716658292	76.4276318706467	-73.568203016428	80.1248658835439
399__a550817.4325016.052018.798_D04.CEL	19.1675630509039	-26.5625985272861	-38.7924438529706	42.8462790007879	-33.0735448562236	105.280070848895
401__a550817.4325016.052018.798_D06.CEL	5.67180426298145	-34.7783285713349	-49.8576989152932	30.1719589479733	-17.5879607205869	144.023825864837
402__a550817.4325016.052018.798_D07.CEL	48.0476430105821	-5.12674171924879	-32.3197122914992	45.1951705053034	-31.7006275672147	102.318202172806
403__a550817.4325016.052018.798_D08.CEL	1.72627781085329	-35.6340668076738	-25.0895053907976	50.5399957919778	-17.4714731671037	130.243827789969
404__a550817.4325016.052018.798_D09.CEL	116.122953984048	-2.92562417420836	4.48025142751173	35.3205840874735	-58.7494760001975	-11.8960316397388
405__a550817.4325016.052018.798_D10.CEL	74.8244922105005	-12.8346221847357	11.9968173387214	-8.17575305940355	4.59415927426621	28.2648128385445
406__a550817.4325016.052018.798_D11.CEL	84.7362130007184	-19.8077479998531	37.8656576840554	24.4164506129015	-6.86767896647877	15.4898499101693
408__a550817.4325016.052018.798_E01.CEL	79.0162658869174	-16.6062524708847	23.3928387315951	20.5629142030832	-20.9225907632998	11.2573082892754
409__a550817.4325016.052018.798_E02.CEL	93.1840642282361	18.3105314192047	33.0713740219207	3.53958261199092	-8.31118799829909	1.28370716000018
410__a550817.4325016.052018.798_E03.CEL	82.0839276565784	-9.07529750134724	26.762306933007	20.3240269708723	-20.8396854217753	11.4205595254489
411__a550817.4325016.052018.798_E04.CEL	79.4544842330248	-16.0909211206242	30.9647537700528	2.94375682603564	-31.5837817888051	15.5300248040768
412__a550817.4325016.052018.798_E05.CEL	8.95092369958583	-66.426403253696	29.5508905776574	-68.775688437771	-72.5521979099408	-35.8404445087717
413__a550817.4325016.052018.798_E06.CEL	-157.346904711003	29.6453101374971	81.2589230700682	-92.2236768917243	-62.9667615599298	5.7665562338576
414__a550817.4325016.052018.798_E07.CEL	11.5470306554641	-56.5222424241342	23.7254527798168	-36.9262927309997	-45.8548633195073	-2.70572055401947
415__a550817.4325016.052018.798_E08.CEL	10.894456027103	-76.7748001198775	45.8565429792804	-81.5134833220993	-44.0549691447995	-26.3321817493489
416__a550817.4325016.052018.798_E09.CEL	91.5742688468133	-51.8389048943762	12.2345236282103	-1.94305148706567	15.0811216177657	-6.24657425377264
418__a550817.4325016.052018.798_E11.CEL	51.5546643111856	-34.1327458065383	-4.71725339433912	19.8379328856764	15.4364795172946	77.6430719574921
420__a550817.4325016.052018.798_F04.CEL	-8.17910779932395	82.1815632034975	44.192193953747	-95.6127604731179	-20.1118953162208	28.751983361429
421__a550817.4325016.052018.798_F05.CEL	5.35511691423741	84.4721039640241	42.5041224667341	-87.8708663412251	-40.9531898377122	3.86847258770955
422__a550817.4325016.052018.798_F06.CEL	12.2136628970902	86.5448171782413	58.7114611888548	-70.1666586185757	-4.23662940122332	19.5143553311308
423__a550817.4325016.052018.798_F09.CEL	39.5239664043938	68.3396033387305	48.8364212954214	-72.7450851472235	-14.8449841189399	23.4882566930385
424__a550817.4325016.052018.798_F10.CEL	27.4912989275875	85.0157693958979	41.7582959331822	-85.664063668429	-8.10669927453504	9.50135208027184
425__a550817.4325016.052018.798_F11.CEL	-3.92378765925891	115.663027380224	37.5898386782836	-100.411296446464	-40.5691394819561	3.55730454789666
426__a550817.4325016.052018.798_F12.CEL	-30.3406670377519	4.41568843061065	17.6342180664281	-45.0578522293024	-37.024535153458	37.8161585255717
427__a550817.4325016.052018.798_G02.CEL	24.0921177752129	75.9798068023857	-45.3070930364661	-0.885805227383903	39.5090934270658	4.70568739574889
428__a550817.4325016.052018.798_G03.CEL	24.8702794414242	74.4188278090569	-29.5694729230323	-16.6280846910286	59.6915932327901	-8.87300044588266
429__a550817.4325016.052018.798_G05.CEL	52.0378708568469	86.9076691802026	-31.350483767254	-3.98078109541541	32.7467465929906	2.03400064436571
430__a550817.4325016.052018.798_G06.CEL	35.4802623611052	84.3599409768426	-29.3970231132055	-12.4548384246356	22.5741001648629	8.94751950759375
431__a550817.4325016.052018.798_G09.CEL	-75.9563325432147	-27.3723259122758	-131.103596718743	11.8579941254606	35.0414369789912	-16.074680088059
432__a550817.4325016.052018.798_G12.CEL	-88.9762728235171	-44.1192375559389	-123.321612812789	19.7552004573948	39.9866368756186	-21.9493779272102
433__a550817.4325016.052018.798_H03.CEL	-90.457814665477	-18.9331563186784	-125.910973637025	18.3556032993831	31.270371121515	-17.2532864832742
435__a550817.4325016.052018.798_H07.CEL	-77.4295191331164	-35.8730870991472	-111.193022192813	27.807363952496	47.279070256469	-49.2023891383474
436__a550817.4325016.052018.798_H12.CEL	-15.4124712753416	-49.1532062101177	5.3942822528284	-29.4553845251067	93.7217499836524	53.9898636339696
437__a550817.4325016.052018.799_A02.CEL	55.3569629582776	-44.5305324480551	14.1458417409262	-12.1738005018142	-2.14049911171182	18.9819058508647
438__a550817.4325016.052018.799_A07.CEL	-65.7842305543313	47.1281310919948	10.3329958714015	14.1288466467041	-77.4998576877517	27.9944555129712
439__a550817.4325016.052018.799_A10.CEL	45.5168125492296	-60.8198355892314	46.4659473294928	24.7404591636959	4.59641751988189	37.9257484745942
441__a550817.4325016.052018.799_B04.CEL	14.521177262543	-48.2711113200426	19.5436245247163	-93.7393591482114	-78.2301041618205	-11.9774523658147
443__a550817.4325016.052018.799_B07.CEL	-119.078625458649	10.1094070031686	73.4044091827884	19.4932809264087	44.7682750534856	58.9909399976339
444__a550817.4325016.052018.799_B08.CEL	56.5996286292767	-64.9814511703688	42.0795507676264	-7.97440864422191	15.2498529115167	40.1856941843925
445__a550817.4325016.052018.799_B12.CEL	-34.1185684155366	112.2162997835	86.697329999595	-51.2865576038552	21.4216687355646	29.5186577492826
446__a550817.4325016.052018.799_C02.CEL	-0.619581550357723	-48.7582530459816	31.0573773950199	-83.8059326630187	-53.9554584366304	-35.2098858786906
447__a550817.4325016.052018.799_C05.CEL	56.0852665193435	-40.3045727218905	4.60060138875	-7.78723493501612	8.57303850453364	38.3170454458994
448__a550817.4325016.052018.799_C10.CEL	23.1695299941583	-72.0284941627983	23.7956169490536	-105.856334140776	-43.3114894516884	7.22854517037801
450__a550817.4325016.052018.800_C05.CEL	-115.952306210137	-22.7389554174535	23.716573695695	53.7118247726872	45.513392290811	-15.3237457931249
451__a550817.4325016.052018.800_C07.CEL	-113.888681511574	-20.1645045743764	30.6867997236197	44.0402870539074	43.8848849438967	-16.7750797695226
452__a550817.4325016.052018.800_C08.CEL	-124.326500684609	-35.7283706206684	51.0134734908407	35.9192266479352	34.1323497315493	-32.1525115939492
453__a550817.4325016.052018.800_D05.CEL	-143.612921741352	-0.188665933561191	32.6808923404271	30.0929931058628	8.12024513403972	-43.8514138074243
454__a550817.4325016.052018.800_D06.CEL	-28.2252386190663	112.397506179616	74.9797169232485	-73.8045467028435	27.5216934138081	16.9459064556468
455__a550817.4325016.052018.800_E05.CEL	21.3898225977336	-40.3121236599297	26.8446156591167	-43.1306766367403	-11.9392614001768	-38.7625225571713
456__a550817.4325016.052018.800_E06.CEL	9.33470118092229	-47.2386640472348	61.6586000233352	-27.1715608902424	-25.199062576449	-7.21066573394389
457__a550817.4325016.052018.800_E09.CEL	-20.2893876982486	99.7707409077282	83.4247917514044	-52.7785288577526	36.590451649198	9.18566284699479
458__a550817.4325016.052018.800_F01.CEL	-122.76561463939	-44.7085537323007	60.4713932871666	46.6564264956041	57.9400518248746	-44.0636593970393
459__a550817.4325016.052018.800_F06.CEL	-69.1920426143376	-33.7383285604185	-9.8287024640903	11.24825185502	-17.705206910486	-0.466638536999449
460__a550817.4325016.052018.800_F11.CEL	-70.5722347031397	-6.98226729473496	-101.591702529735	-71.0956727936793	-12.1314085776219	0.016800913706403
461__a550817.4325016.052018.800_F12.CEL	77.0420484753539	-40.9233863740752	13.3773188684805	9.00074508418236	18.567094447667	18.4453914828318
462__a550817.4325016.052018.800_G01.CEL	-35.4728143352168	128.047766598947	74.7747609105032	-60.2480095110733	15.0314289521332	31.8470855001985
463__a550817.4325016.052018.800_G02.CEL	-42.2763700332958	90.5931455501569	95.7667560766562	-69.3964102673578	5.26758270989258	27.1464494779245
464__a550817.4325016.052018.800_G03.CEL	-16.8040889550904	83.6361284458875	69.5795754625141	-55.9931988311562	38.8005558543432	16.8004916836516
465__a550817.4325016.052018.800_G04.CEL	72.1698183557158	-5.1510590546678	42.3292239648256	-0.385235898993683	-8.86013921707966	-22.2567580010967
466__a550817.4325016.052018.800_G05.CEL	72.3090710132831	-27.6179010004243	11.1481095494155	-21.2254107018736	21.5575068010353	-9.61900495273592
467__a550817.4325016.052018.800_G06.CEL	56.1441524246873	-42.7339463198998	8.4753665421345	-27.2499312542098	12.282017457112	-20.8912328169983
468__a550817.4325016.052018.800_G09.CEL	80.539612011823	-10.1217859156625	13.7877947782621	4.46108178734535	-8.11272818909994	8.09437697848561
469__a550817.4325016.052018.800_H04.CEL	-75.7079823529242	21.0237784902577	-86.0381868471104	-3.682030862699	89.2724836931206	-18.2607306365061
470__a550817.4325016.052018.800_H07.CEL	-66.8520577126584	-3.50810503065425	-111.884203041444	-0.871903307497348	62.0978316099306	26.5273889230391
471__a550817.4325016.052018.800_H08.CEL	71.0015746469904	-37.0246740727957	12.3079869284488	-7.13767343702859	18.4325548132538	-23.5390301017096
472__a550817.4325016.052018.800_H10.CEL	-86.1077679510912	2.11316587702508	-107.403254934448	1.83493602949757	63.7698166061612	20.7074677295012
473__a550817.4325016.052018.800_H11.CEL	83.5416234139015	-17.5394728159361	9.45154090142258	6.44757233595902	-20.2650283635116	-6.28427806016183
474__a550817.4345742.120218.220_A12.CEL	-186.110336980704	74.4164215423722	111.729615761282	-84.1029814301758	-131.435782422466	11.151537999957
475__a550817.4345742.120218.220_B11.CEL	-7.81215866749985	50.664259564169	-10.1867157715285	28.9926327781277	-14.2404353420343	66.2737379303938
476__a550817.4345742.120218.220_B12.CEL	6.06406740173326	89.9052793470201	20.9501655490546	30.2869615021337	30.5801528949345	50.3635691595573
477__a550817.4345742.120218.220_C11.CEL	-153.890086813438	-3.78484426930024	-56.8806559071467	88.5927768955704	-165.895214619303	-71.6850795137905
478__a550817.4345742.120218.220_C12.CEL	16.3401581902156	-8.67131782858547	-3.74459686267702	21.0112127087723	-19.0485599632658	141.45182216723
479__a550817.4345742.120218.220_D11.CEL	-155.430821576285	54.1404385309907	61.6869284942787	-69.0775901624449	-154.518269944658	-3.83446377747054
481__a550817.4345742.120218.220_E04.CEL	14.4518142239103	138.194430900642	39.240438585174	6.12607376950358	13.3252095343921	19.986217268244
482__a550817.4345742.120218.220_E10.CEL	-158.648007553147	29.869353466779	79.9678439835863	-54.27320353925	-87.2451649283462	-44.5151461041632
483__a550817.4345742.120218.220_E11.CEL	-142.344012304207	54.5919368606203	60.273518715193	-83.5832245591718	-162.315200056077	-12.5734499240843
484__a550817.4345742.120218.220_E12.CEL	48.1140897860376	-5.39940375161141	-36.6603329428116	7.45067006690075	6.59554449417281	104.527992026807
485__a550817.4345742.120218.220_F10.CEL	8.28767009372143	87.7042848549436	16.7739253281436	43.8367833475312	20.5683007242836	54.5742496015874
486__a550817.4345742.120218.220_F11.CEL	-151.160347646127	49.8634670724416	63.932448771154	-81.6719642619648	-156.565391299378	-11.1512579281892
487__a550817.4345742.120218.220_F12.CEL	71.77644728212	47.172385316307	-52.8536651237742	46.182858701164	-22.0436565888432	48.0111721764063
489__a550817.4345742.120218.220_G08.CEL	-25.103740462674	8.49716547263281	-39.2850681254872	109.720285154097	-115.193480241941	43.6191512932021
490__a550817.4345742.120218.220_G10.CEL	-40.9187696027564	44.4411057785896	7.22269792292947	11.4230287374219	-68.6900452459576	36.8949531175328
491__a550817.4345742.120218.220_G11.CEL	-139.05543795387	50.0818351802007	58.0017334848441	-80.9611649937616	-169.333747676704	-11.71246472203
492__a550817.4345742.120218.220_G12.CEL	9.67864440793237	99.430139327877	-9.51223010770127	62.3392322299888	-9.26132330589875	49.8093320602469
493__a550817.4345742.120218.220_H10.CEL	-53.1128212289848	30.0408389206553	30.2263116252583	0.724388254535043	-50.734242417035	43.5072741284096
494__a550817.4345742.120218.220_H11.CEL	4.07224253167583	2.94969421352566	-44.870885762243	-13.5461809007967	26.0905756129196	32.1224036152568
495__a550817.4345742.120218.221_A03.CEL	18.2049676360305	45.9452336521852	-10.1916459451836	57.6901221025701	-15.1771461503744	90.1787458216358
496__a550817.4345742.120218.221_A11.CEL	67.3120908083232	-36.1910529946973	14.9896014178767	31.5430571243586	-12.6381547526384	21.9246748334481
498__a550817.4345742.120218.221_D01.CEL	69.5555444963118	152.2148891642	-26.2864940752275	32.5651930731066	16.6142884855358	-7.98356966865295
499__a550817.4345742.120218.221_D03.CEL	76.6968271737042	-12.6349139185669	16.1611167014256	10.8243278436389	9.81972958196108	-15.4321490163399
500__a550817.4345742.120218.221_D10.CEL	71.7143561055979	-104.803434485613	33.6773226523988	-19.7966879207929	54.7537547324087	9.89898396587118
501__a550817.4345742.120218.221_E01.CEL	87.3096848537613	-4.89245650736128	28.7923974402833	16.98154076601	-28.6263262876877	6.08547540913036
502__a550817.4345742.120218.221_F01.CEL	80.6258322761325	-17.2357770179296	30.6087636509962	11.5159270039391	-7.58527659622024	13.1048612707183
503__a550817.4345742.120218.221_F11.CEL	-73.530357341484	21.9197147172346	-89.5008544123113	-10.2617591463589	57.9117767516613	-3.86288071836193
504__a550817.4345742.120218.221_F12.CEL	-79.4662563077179	-2.88367550586556	-100.647501002955	10.5665904759535	74.7217723166594	2.74734042949605
505__a550817.4345742.120218.221_G01.CEL	80.794032665731	-24.8413411114953	22.906917345724	7.52124151617644	10.0125141142669	27.6911059900555
506__a550817.4345742.120218.221_G02.CEL	26.3817327709931	-56.3610519604783	25.2950572155373	-101.089280229502	-57.3574913783187	-38.9955145049889
507__a550817.4345742.120218.221_G11.CEL	14.9547355965566	-55.7717611220992	30.6942541721604	8.26730429329016	6.68800335196605	-112.389554667323
508__a550817.4345742.120218.221_G12.CEL	20.4972929413587	-26.7343938544268	-49.1120770539481	53.9856560225237	-16.1244542248396	96.249776246683
509__a550817.4345742.120218.221_H02.CEL	17.958393923938	97.3490616743088	13.1496240505563	23.3046484096233	15.0944539420699	46.6904541139466
510__a550817.4345742.120218.221_H03.CEL	18.8155425103261	122.44544901194	-0.64517266728237	18.6887878967878	11.3843892597122	38.5943997358738
516__a550817.4345742.120218.222_A11.CEL	-168.05763361433	-26.8773047893625	82.264639883137	57.3109554112631	-3.31029153457953	-47.6555004755652
517__a550817.4345742.120218.222_A12.CEL	-180.658840444779	-17.3436833350415	82.8927770170459	50.4338418841954	14.6587538091631	-73.157490044015
518__a550817.4345742.120218.222_B01.CEL	-144.7363438377	-10.6899974267019	84.0991142837804	59.6765952105635	-0.369882166076841	-16.6443394824799
519__a550817.4345742.120218.222_B02.CEL	-170.487422128871	-12.203764034724	84.4605816942753	46.3371708741708	64.0913578027812	-47.2722519750065
520__a550817.4345742.120218.222_B03.CEL	-166.737074129937	-8.36498680619643	86.2824419088383	37.8218938066551	27.5914795851157	-44.1664493081188
521__a550817.4345742.120218.222_B04.CEL	-183.422644936163	-0.242778160690839	91.1056300408977	70.8720877802168	15.1889119398421	-22.2206837437056
523__a550817.4345742.120218.222_B06.CEL	-142.716797077132	-28.0149019631218	63.7559054563057	44.9579989584479	35.4188090134457	-5.25052179244175
524__a550817.4345742.120218.222_B07.CEL	-142.699851540307	-38.2660103607499	17.9200545135637	49.7998459777305	30.4808975684302	-15.4921958821716
525__a550817.4345742.120218.222_B08.CEL	-88.5174858195368	-44.3372721741783	-2.67828858557146	-33.9545981052205	-31.5071293411263	-27.3768888330279
527__a550817.4345742.120218.222_B10.CEL	63.9811530305483	-90.4357284713736	33.2245585026781	-13.9527378612999	34.5944690969825	25.5316198691891
528__a550817.4345742.120218.222_B11.CEL	75.8023593697054	-109.571268151038	8.56659311405716	-12.0748188058306	19.2430808870609	-18.2626897548722
529__a550817.4345742.120218.222_B12.CEL	54.0744009558698	-106.691898362656	46.9543451618822	-29.033671776156	35.2591054294512	-6.54256008388731
530__a550817.4345742.120218.222_C01.CEL	-133.229537751402	-1.35340169682379	79.0368606245614	38.4995920386204	34.7210166025932	65.1593334529315
531__a550817.4345742.120218.222_C02.CEL	-129.500446847822	6.44503739925864	65.0450932258768	19.3721174092798	55.5059744241964	60.854140704602
532__a550817.4345742.120218.222_C03.CEL	-135.202513812964	13.2335607641725	64.8149629311688	26.4145001542068	37.0960253127122	72.4394202482336
533__a550817.4345742.120218.222_C04.CEL	-125.902090265786	10.6426347438398	78.3771003445232	22.0234047090719	52.3919138994558	82.6282423420671
534__a550817.4345742.120218.222_C05.CEL	-128.166147148002	-18.3515896702801	70.3406986778156	20.4253845364368	45.277689331329	67.2035455180007
535__a550817.4345742.120218.222_C06.CEL	-115.190667165348	8.70471372444894	63.3048738356804	12.6166253680088	29.7821904336392	66.3764483534779
536__a550817.4345742.120218.222_C07.CEL	61.9978816409471	-34.2581590683506	8.32628002231447	20.3892157896285	9.46027776854302	2.09631140090583
537__a550817.4345742.120218.222_C08.CEL	63.4423737798399	-38.0117519873982	19.684394322994	17.4816774701319	-14.2687185943991	20.8153831061828
538__a550817.4345742.120218.222_C09.CEL	57.608457386516	-46.6757172411076	6.2342677951632	-5.8251608016704	-7.03578917450211	-21.3652986149618
539__a550817.4345742.120218.222_C10.CEL	51.554017044209	-54.9459603320524	15.7553722446295	-18.689126895325	-5.10326910761393	-21.2878305549555
540__a550817.4345742.120218.222_C11.CEL	63.9690861699371	-41.893165772228	31.5973759844104	21.2560792678418	9.36600013315285	-11.6947726812341
541__a550817.4345742.120218.222_C12.CEL	82.9799640381583	-25.8528827725824	25.3913422991805	-10.3585729645111	6.56563299865387	-20.005299598795
542__a550817.4345742.120218.222_D01.CEL	57.4391636291571	-19.0216142482213	28.0662671172481	12.2522874263889	-15.3054505534207	-10.7697497090144
543__a550817.4345742.120218.222_D02.CEL	60.6959872087183	-66.035158010193	16.9838669372891	-14.3359032923527	5.85888816795087	3.76920678331732
544__a550817.4345742.120218.222_D03.CEL	72.7980363182304	-37.5886743041269	10.1859924068748	-12.546658095805	-10.0430477177721	-44.3369206671383
545__a550817.4345742.120218.222_D04.CEL	49.1076184161676	-56.1066054500022	12.911588295178	3.6979118060876	16.7317903479281	-41.5039254781467
546__a550817.4345742.120218.222_D06.CEL	69.5730756869518	55.8845115644998	37.3524963564143	-51.958740609132	60.1621429012832	4.25510565487978
547__a550817.4345742.120218.222_D07.CEL	53.1847911775787	86.5671987865158	34.4959392641327	-39.8395720948718	62.5358226189719	-10.2344816456129
548__a550817.4345742.120218.222_D08.CEL	56.1487556945908	59.3885667591391	50.6414813196503	-59.6020745504817	75.7941553228907	-2.34434782721015
549__a550817.4345742.120218.222_D09.CEL	56.4618122804569	71.6113284577234	32.1260112919394	-70.1888020070448	52.4286397069859	13.365067745146
550__a550817.4345742.120218.222_D10.CEL	48.3707678400201	85.671937267389	32.0324995854441	-32.3915994029837	74.3464486805418	9.7124525485028
